# Supplementary material for: What makes physicians thrive? Assessing the mental health of Hungarian physicians with the Stanford Professional Fulfillment Index
Source: Research Square preprint supplement (doi:10.21203/rs.3.rs-6275614/v1), 2025-05-08
Supplement: Supplementary file 1 [file d6c61b1daeda8acf27e9032e.docx]

Items of Stanford Professional Fulfillment Index - the original English items and translated Hungarian version

|  | **Item number** | **Original (English)** | **Hungarian version** | **Scoring system of SPFI** |
| --- | --- | --- | --- | --- |
| **Professional Performance Indicator** | | | | |
| Professional fulfillment subscale | 1. | I feel happy at work | Boldognak érzem magam a munkámban | Not at all true (0); Completely true (4) |
| 2. | I feel worthwhile at work | Értékesnek érzem magam a munkámban |  |
| 3. | My work is satisfying to me | A munkám kielégítő számomra |  |
| 4. | I feel in control when dealing with difficult problems at work | Úgy érzem, ura vagyok a helyzetnek, amikor nehéz munkahelyi problémákat kezelek |  |
| 5. | My work is meaningful to me | A munkámnak értelme van számomra |  |
| 6. | I’m contributing professionally (e.g. patient care, teaching, research, and leadership) in the ways I value most | Az általam legtöbbre értékelt módokon járulok hozzá szakmámhoz (pl. betegellátás, oktatás, kutatás és vezetés) |  |
| Job exhaustion subscale | 7. | **During the past two weeks I have felt …**  a sense of dread when I think about work, I have to do | **Az elmúlt két hétben úgy éreztem**…,  elfog a rettegés, amikor az elvégzendő munkára gondolok | Not at all (0); Extremely (4) |
| 8. | physically exhausted at work | fizikailag kimerültnek éreztem magam a munkában |  |
| 9. | lacking in enthusiasm at work | a lelkesedés hiányát éreztem a munkámban |  |
| 10. | emotionally exhausted at work | érzelmileg kimerültnek éreztem magam a munkámban |  |
| Interpersonal disengagement subscale | 11. | **During the past two weeks my job has contributed to me feeling …**  less empathetic with my patients | **Az elmúlt két hétben a munkám szerepet játszott abban, hogy** …  kevésbé érezzem magam empatikusnak a pácienseimmel | Not at all (0); Extremely (4) |
| 12. | less empathetic with my colleagues | kevésbé érezzem magam empatikusnak a kollégáimmal |  |
| 13. | less sensitive to others’ feelings/emotions | kevésbé tudtam érzékeny lenni mások érzéseivel/ érzelmeivel kapcsolatban |  |
| 14. | less interested in talking with my patients | úgy éreztem, kevéssé érdekel a pácienseimmel való beszélgetés |  |
| 15. | less connected with my patients | úgy éreztem, kevésbé kapcsolódom a pácienseimhez |  |
| 16. | less connected with my colleagues | úgy éreztem, kevésbé kapcsolódom a kollegáimhoz |  |
|  | **Self-reported Medical Errors** | | |  |
|  | | I made a major medical error that could have resulted in patient harm | Súlyos orvosi hibát követtem el, ami a beteg károsodásához vezethetett volna | Never (0); In the last week (5) |
| I made a medical error that did result in patient harm | Olyan orvosi hibát követtem el, aminek következtében a beteg károsodást szenvedett |  |
| I ordered the wrong medication | Rossz gyógyszert írtam fel |  |
| I ordered the wrong lab test | Rossz laborvizsgálatot írtam elő |  |
